# Supplementary material
Source: Springer Nature journal article supplement (https://www.springermedizin.de/resource/supplementary/12889_2008_1269_MOESM2_ESM.pdf/9502824)
Supplement: MOESM2 [file 9502824]

Did you or another physician perform one or more of the following acts (or ensure that one of them was performed), taking into account the probability or certainty that this act would hasten the end of the patient's life?

- a. withholding treatment?  yes  no → **non-treatment decision**
- b. withdrawing treatment?  yes  no → **non-treatment decision**
- c. intensifying the alleviation of pain and/or symptoms by using a drug?  yes  no → **alleviation of pain and symptoms**

---

Was hastening the end of life partly the intention of intensifying pain and symptom alleviation?  yes  no → **alleviation of pain and symptoms**

---

Was death the consequence of one or more of the following acts, which you or another physician decided to perform with the explicit intention of hastening the end of life?

- a. withholding treatment?  yes  no → **non-treatment decision**
- b. withdrawing treatment?  yes  no → **non-treatment decision**

---

Was the death the consequence of the use of a drug prescribed, supplied, or administered by you or another physician with the explicit intention of hastening the end of life (or of enabling the patient to end his or her own life)?  yes  no → **physician-assisted death**

If yes, who administered the drug(s)?  the patient  you or another physician  nurse  someone else → **physician-assisted suicide**

Was the decision concerning the last-mentioned act made after an explicit request of the patient?  yes, after an oral request  yes, after a written request  yes, after an oral and written request  no → **euthanasia**

→ **life-ending act without patient's explicit request**
